# Supplementary material for: Raddeanin A Enhances Mitochondrial DNA‐cGAS/STING Axis‐Mediated Antitumor Immunity by Targeting Transactive Responsive DNA‐Binding Protein 43
Source: PubMed Central journal article supplement (PMC10161045; doi:10.1002/advs.202206737), 2023-03-06
Supplement: ADVS-10-2206737-s001.pdf [file ADVS-10-2206737-s001.pdf]

## Supporting Information

for *Adv. Sci.*, DOI 10.1002/adv.202206737

Raddeanin A Enhances Mitochondrial DNA-cGAS/STING Axis-Mediated Antitumor Immunity by Targeting Transactive Responsive DNA-Binding Protein 43

*Mingxiao Yin, Jingwen Dong, Cuicui Sun, Xiaojia Liu, Zhirui Liu, Lu Liu, Zean Kuang, Na Zhang, Dian Xiao, Xinbo Zhou\* and Hongbin Deng\**

## **Supporting Information for**

### **Raddeanin A enhances mitochondrial DNA-cGAS/STING axis-mediated antitumor immunity by targeting TDP-43**

*Mingxiao Yin, Jingwen Dong, Cuicui Sun, Xiaojia Liu, Zhirui Liu, Lu Liu, Zeang Kuang, Na Zhang, Dian Xiao, Xinbo Zhou, \* and Hongbin Deng\**

#### **This file includes:**

Figure S1. RA induces an apoptosis-dependent ICD.

Figure S2. RA-treated tumor cells promote DCs maturation.

Figure S3. RA suppresses tumor growth and shows little toxicity and side effect in mice.

Figure S4. RA activates DCs and CD8<sup>+</sup> T cells *in vivo*.

Figure S5. RA induces cGAS/STING-dependent NF- $\kappa$ B and type I IFN signaling activation in B16 cells.

Figure S6. TDP-43 is a specific target for RA.

Figure S7. RA induces mtDNA leakage and activates cGAS/STING signaling.

Figure S8. Effects of RA on tumor growth and tumor microenvironment.

Figure S9. Gating strategies for FASC analysis.

Table S1. Reagents and commercial assay kits used in this study.

Table S2. Antibodies used for immunoblotting.

Table S3. Antibodies used for FACS, IF and IHC analysis.

Table S4. Forward and reverse primers for qPCR.

Table S5. sgRNA sequence for knocking out the indicated proteins.

Table S6. siRNA sequence for knocking down the indicated proteins.

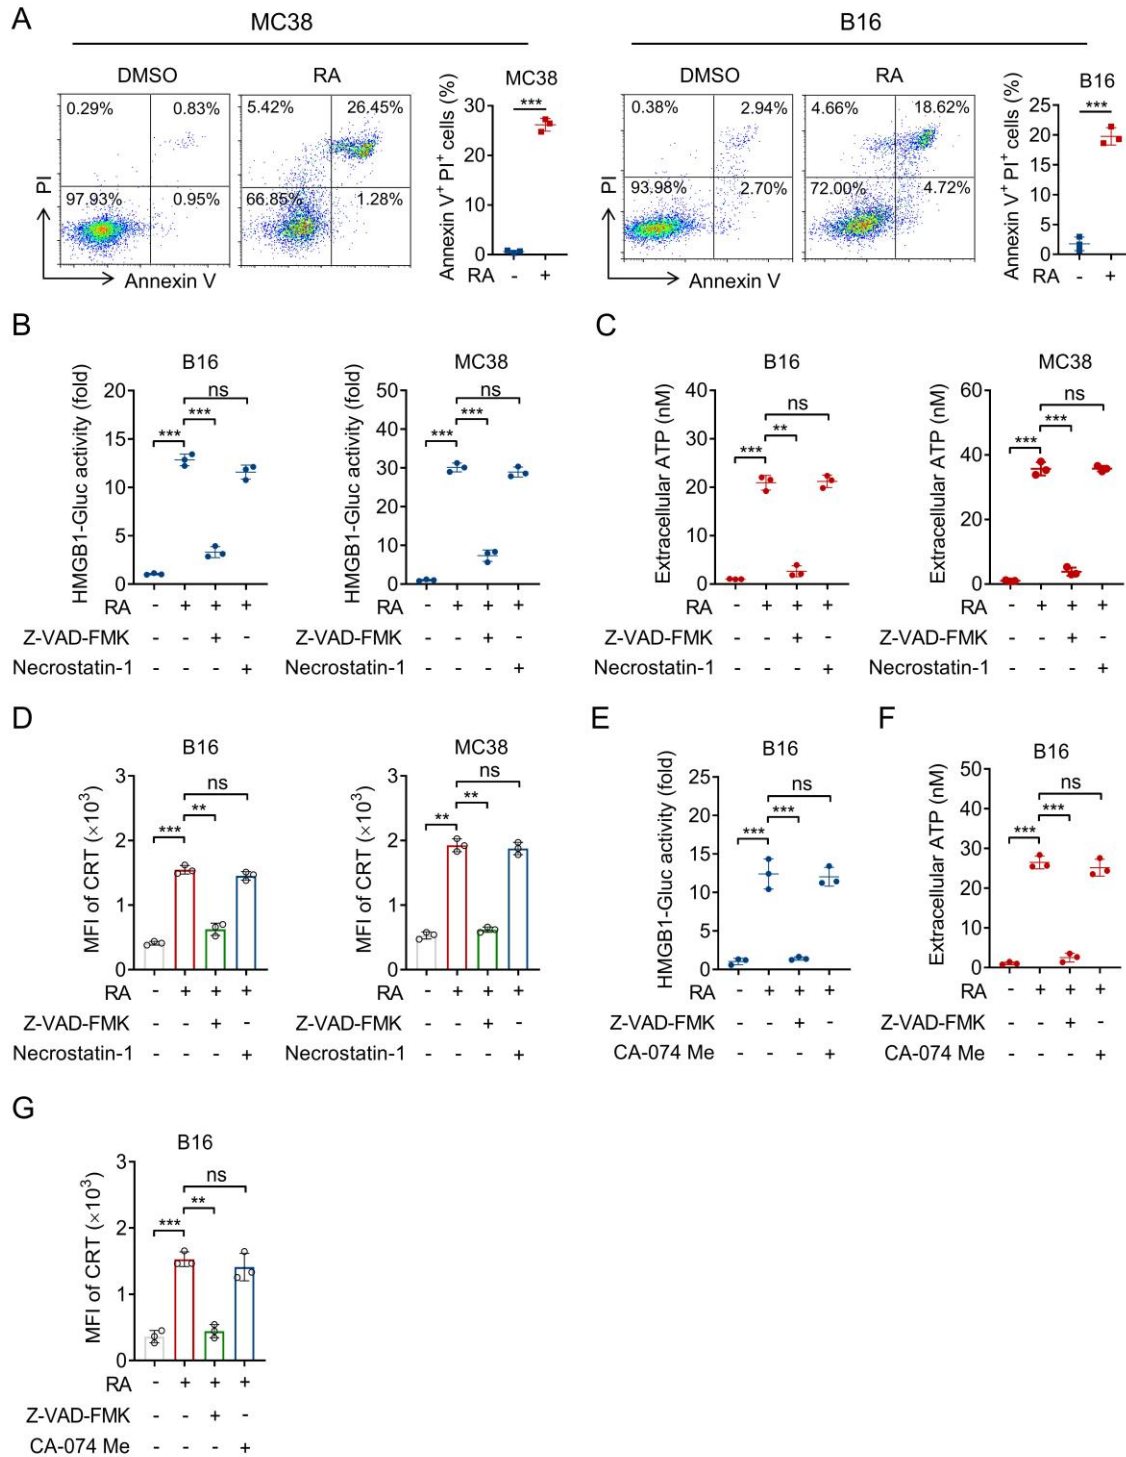

**Figure S1. RA induces an apoptosis-dependent ICD.** (A) FACS determining the apoptosis in B16 and MC38 cells treated with DMSO or RA (5  $\mu$ M) for 20 hours. (B-D) B16 and MC38 cells were treated with RA (5  $\mu$ M) alone, or together with Z-VAD-FMK (100  $\mu$ M) or Necrostatin-1 (10  $\mu$ M) for 20 hours, HMGB1-Gluc luciferase activities (B), extracellular ATP levels (C), and surface expressions of CRT (D) were measured. (E-G) B16 cells were treated with RA (5  $\mu$ M) alone, or together with cathepsin B inhibitor CA-074 Me (50  $\mu$ M) for 20 hours, HMGB1-Gluc luciferase activities (E), extracellular ATP levels (F), and surface expressions of CRT (G) were measured. Data are shown as mean  $\pm$  SEM of 3 independent experiments. \*\*  $P < 0.01$ , \*\*\*  $P < 0.001$ , ns, not significant, unpaired Student's  $t$  test (A), two-way ANOVA test (B-G).

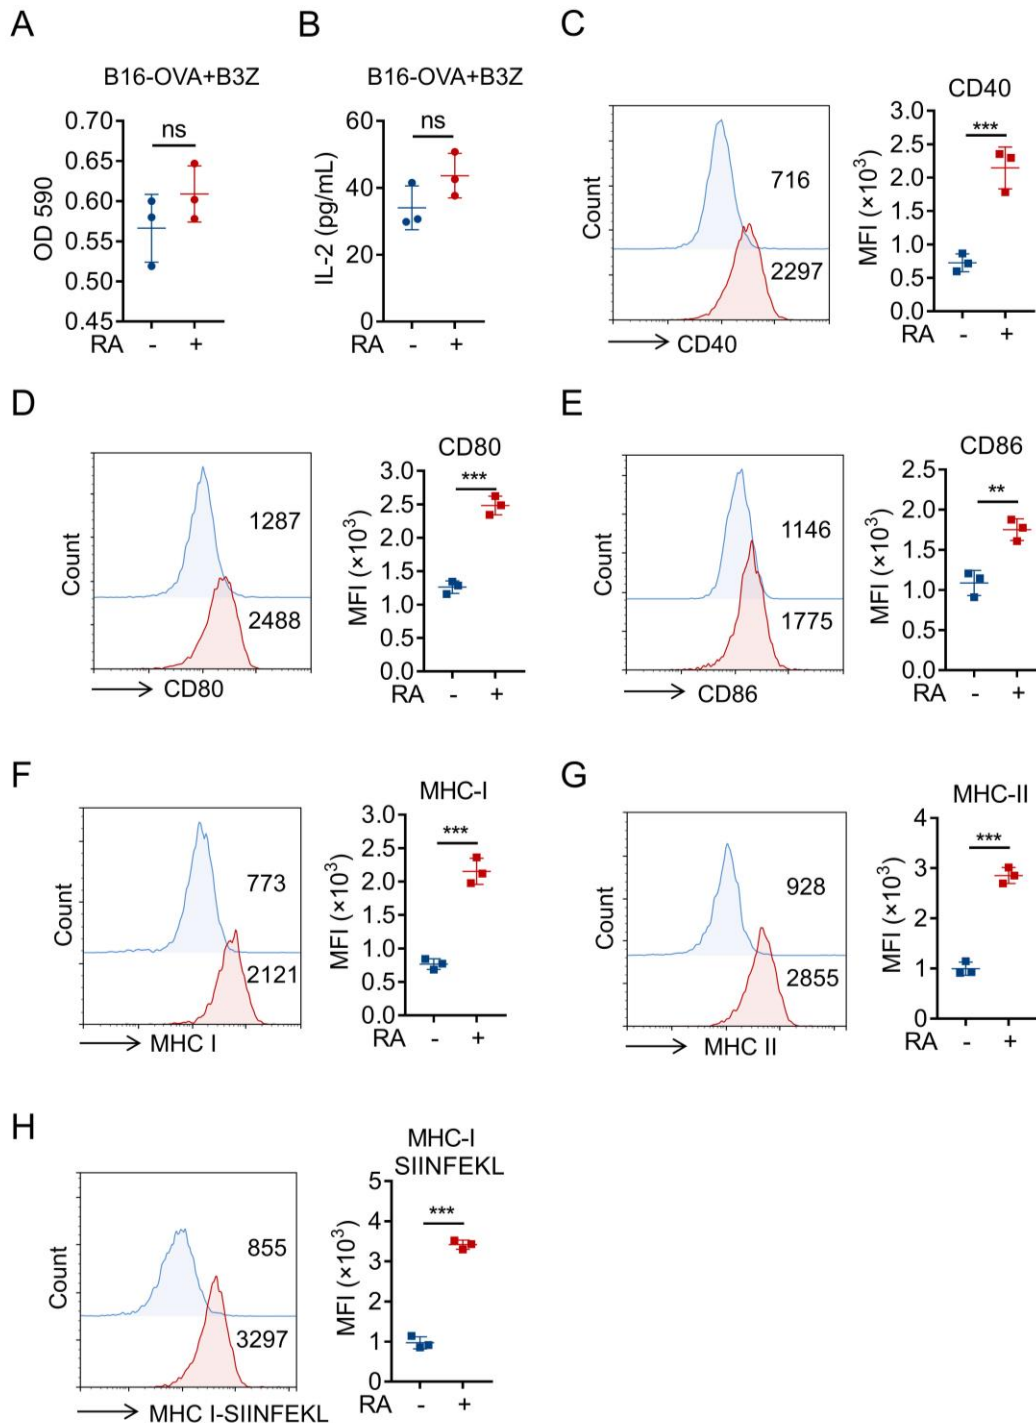

**Figure S2. RA-treated tumor cells promote DCs maturation.** (A and B) B16-OVA cells were treated with DMSO or RA (5  $\mu$ M) for 24 hours, followed by coculturing with B3Z cells for an additional 24 hours, and then LacZ activity (A) and IL-2 production (B) were measured. (C-H) MC38-OVA cells were treated with DMSO or RA (5  $\mu$ M) for 24 hours, then cocultured with BMDCs for an additional 24 hours, after which surface expressions of CD40, CD80, CD86, MHC-I, MHC- II, and MHC-I-S IINFEKL on CD11c<sup>+</sup> BMDCs were determined by FACS. Data are shown as mean  $\pm$  SEM of 3 independent experiments. \*\* P < 0.01, \*\*\* P < 0.001, ns, not significant, unpaired Student's *t* test (A-H).

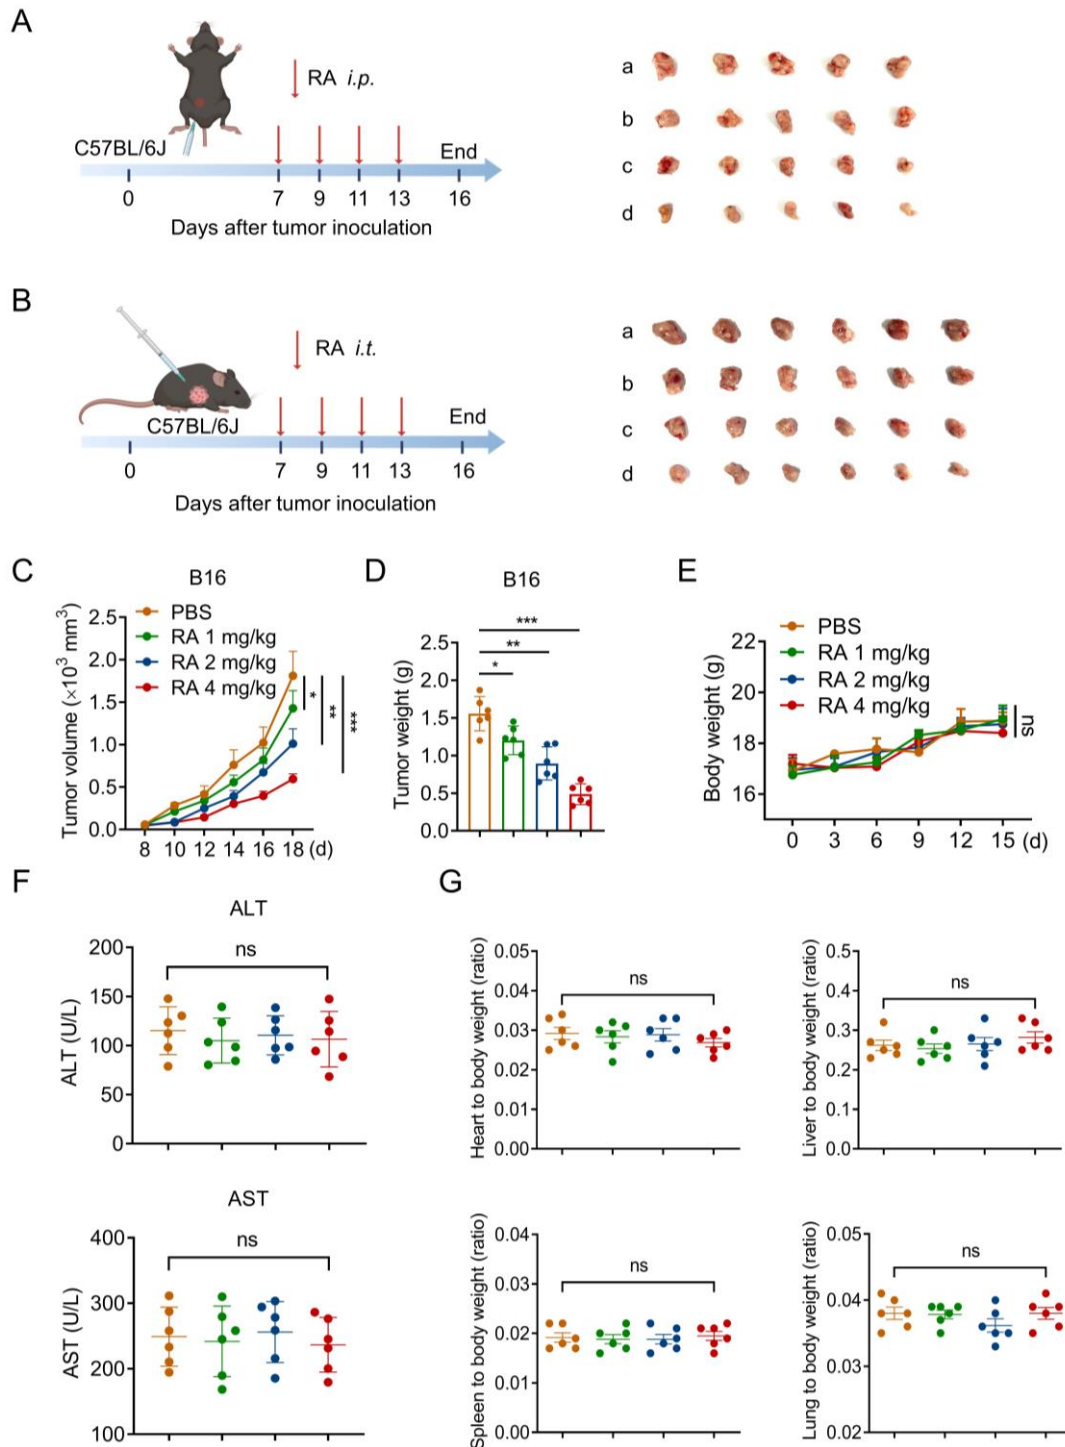

**Figure S3. RA suppresses tumor growth and shows little toxicity and side effect in mice.**

(A-B) C57BL/6 mice with subcutaneous MC38 tumor were intraperitoneally (*i.p.*) or intratumorally (*i.t.*) injected with PBS or RA (1, 2 and 4 mg/kg) at the indicated times. The arrows indicate the treatment protocol. The tumors were *Ex vivo* observed from the PBS or RA treated mice. (C-D) C57BL/6 mice with subcutaneous B16 tumor were intratumorally (*i.t.*) injected with PBS or RA (1, 2 and 4 mg/kg), the tumor volume (C) and tumor weight (D) were monitored. (E) The curves of the body weight of RA (4 mg/kg, *i.t.*) treated mice were recorded every three days. (F) The serum biochemistry indices ALT and AST of each group after RA (4 mg/kg, *i.t.*) treatment were measured. (G) After RA (4 mg/kg, *i.t.*) treatment for 16 days, heart, liver, spleen, and lung of each group were taken out for weighing, the ratios of organ weight to body weight were shown. Data are presented as mean  $\pm$  SD, n=6 per group; \*

P < 0.05, \*\* P < 0.01, \*\*\* P < 0.001, ns, no significant, one-way ANOVA test (D, F, G), two-way ANOVA test (C, E).

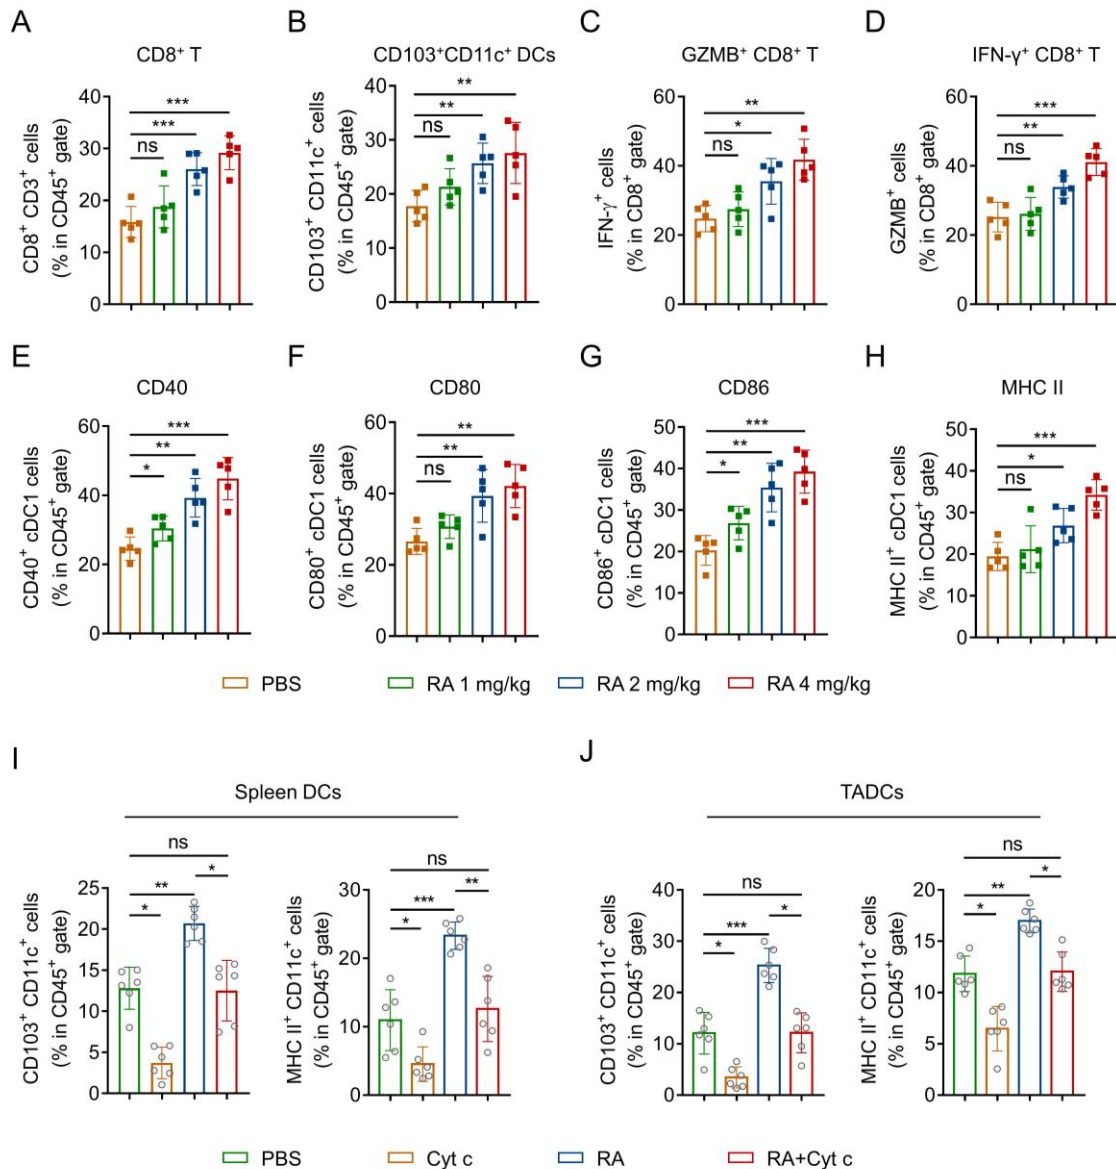

**Figure S4. RA activates DCs and CD8<sup>+</sup> T cells *in vivo*.** C57BL/6 mice with subcutaneous MC38 tumor were intraperitoneally (*i.p.*) injected with PBS or RA (1, 2 and 4 mg/kg). (A-D) FACS analyzing the numbers of tumor-infiltrating CD8<sup>+</sup> T cells (A), CD103<sup>+</sup> CD11c<sup>+</sup> DCs (B), and effector molecules GZMB (C) and IFN-γ (D) in CD8<sup>+</sup> T cells. (E-H) Surface expression levels of CD40, CD80, CD86, and MHC- II on cDC1 cells were determined by FACS. n = 5 mice per group. (I and J) C57BL/6 mice bearing MC38 tumor were treated with vehicle, *Cyt c* that depleted DCs, and/or RA (4 mg/kg, *i.t.*). The populations of cDC1 and expression levels of MHC- II on cDC1 cells in spleen and tumor were determined by FACS. n = 6 mice per group. Data are presented as mean ± SD, \* P < 0.05, \*\* P < 0.01, \*\*\* P < 0.001, ns, not significant, one-way ANOVA test (A-J).

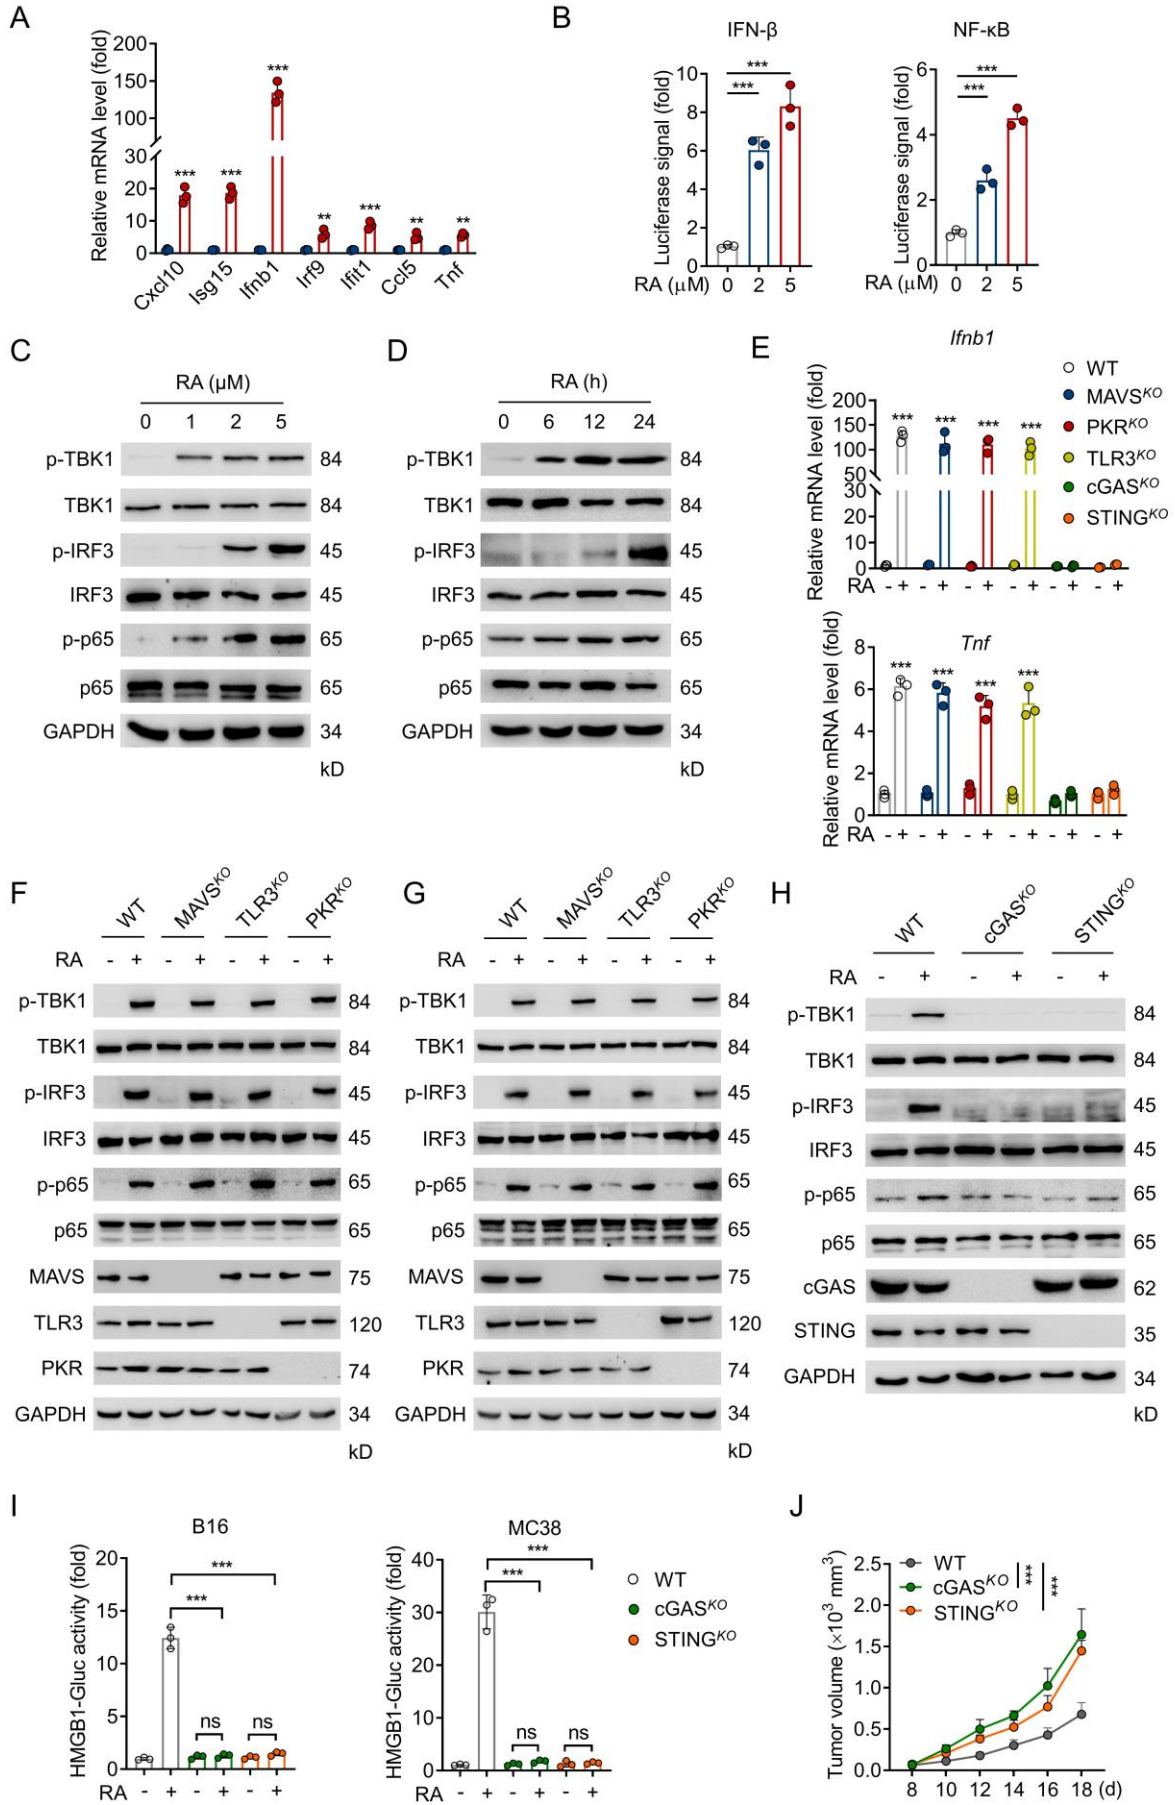

**Figure S5. RA induces cGAS/STING-dependent NF- $\kappa$ B and type I IFN signaling activation in B16 cells.** (A) qPCR analyzing NF- $\kappa$ B and type I IFN pathways associated genes in B16 cells treated with DMSO or RA (5  $\mu$ M) for 24 hours. (B) Reporter gene assay determining the IFN- $\beta$  and NF- $\kappa$ B activity in B16 cells treated with DMSO or RA (5  $\mu$ M) for 24 hours. (C and D) Immunoblotting analysis of the phosphorylation levels of TBK1, IRF3 and p65 in B16 cells treated with indicated concentrations of RA for 24 hours (C), or with RA (5  $\mu$ M) for different time (D). (E) Innate immune sensors in B16 cells were knockout by sgRNA, the expression of *Ifnb1* and *Tnf* were examined by qPCR after treatment with DMSO or RA (5  $\mu$ M) for 24 hours. (F and G) Immunoblotting analysis of the phosphorylation levels of TBK1, IRF3 and p65 in WT, MAVS<sup>KO</sup>, TLR3<sup>KO</sup>, or PKR<sup>KO</sup> MC38 cells (F) and B16 cells (G) treatment with DMSO or RA (5  $\mu$ M) for 24 hours. (H) Immunoblotting analysis of the phosphorylation levels of TBK1, IRF3 and p65 in WT, cGAS<sup>KO</sup>, or STING<sup>KO</sup> B16 cells treated with DMSO or RA (5  $\mu$ M) for 24 hours. (I) Luciferase assay analysis of the HMGB1-Gluc activity in WT or cGAS<sup>KO</sup>, STING<sup>KO</sup> B16-HMGB1-Gluc and MC38-HMGB1-Gluc cells after treatment with DMSO or RA (5  $\mu$ M) for 24 hours. (J) Tumor growth of cGAS<sup>KO</sup> or STING<sup>KO</sup> MC38 from RA (4 mg/kg) treated C57BL/6 mice (n=6). Data are shown as mean  $\pm$  SEM of 3 independent experiments. \*\* P < 0.01, \*\*\* P < 0.001, unpaired Student's *t* test (A), one-way ANOVA test (B), two-way ANOVA test (E, I, J).



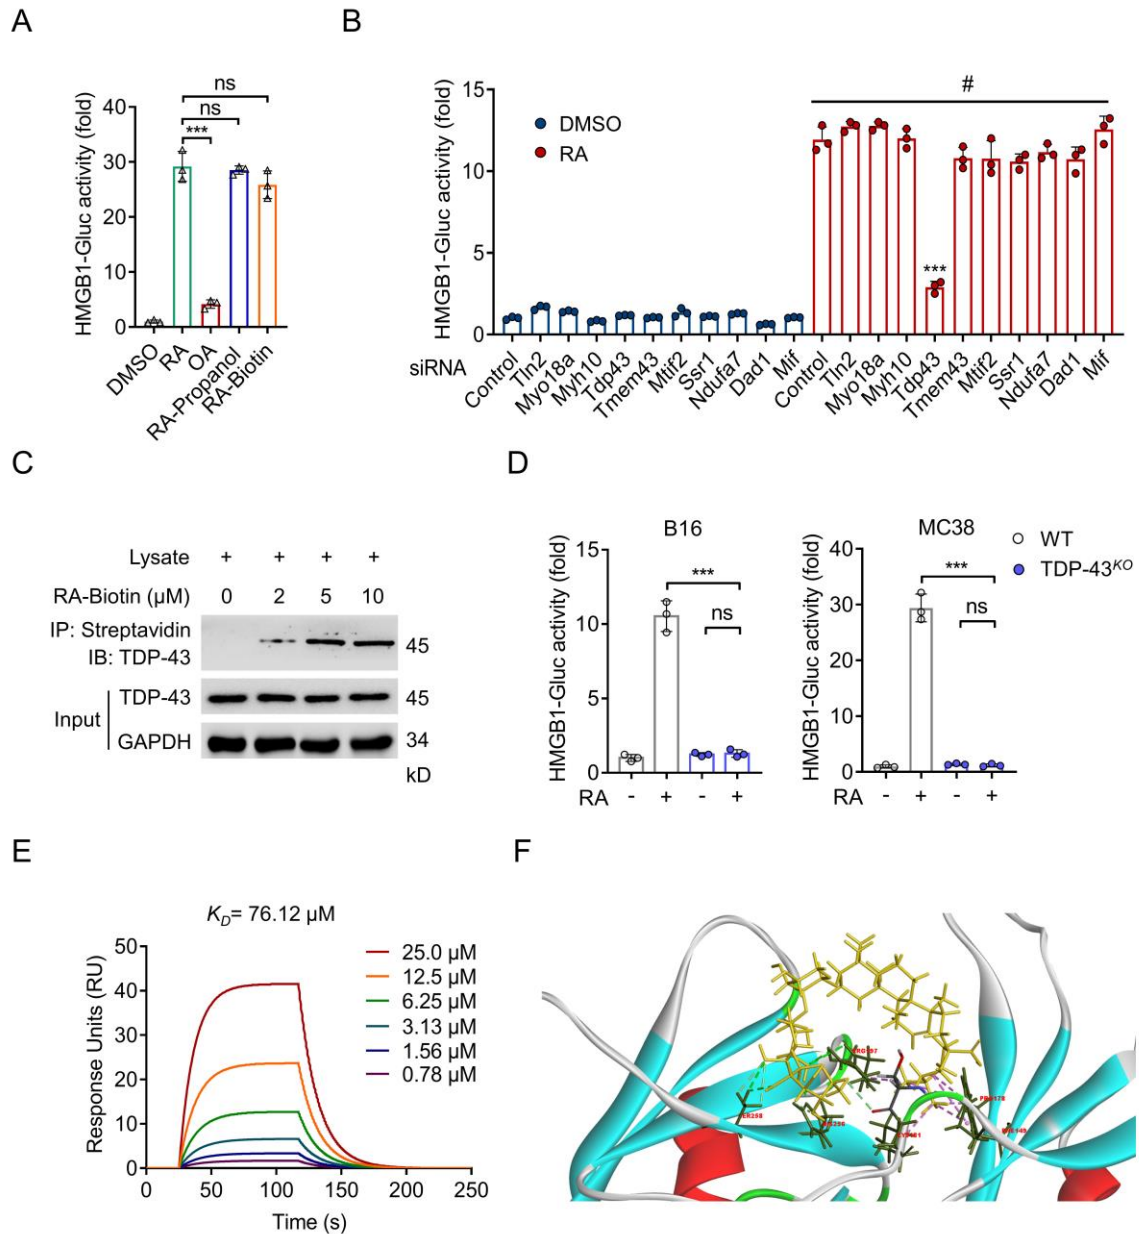

**Figure S6. TDP-43 is a specific target for RA.** (A) Luciferase assay determining the HMGB1 release in MC38-HMGB1-Gluc cells treated with indicated compounds for 20 hours. (B) Luciferase assay analyzing the HMGB1-Gluc activity in B16-HMGB1-Gluc cells with the indicated genes knockout after treatment with DMSO or RA (5  $\mu$ M) for 20 hours. (C) B16 cell lysate was incubated with indicated RA-biotin overnight at 4  $^{\circ}$ C, the mixtures were precipitated by streptavidin-agarose and immunoblotted with TDP-43 antibody. (D) Luciferase assay analysis of the HMGB1-Gluc activity in WT or TDP-43<sup>KO</sup> MC38-HMGB1-Gluc and B16-HMGB1-Gluc cells after treatment with DMSO or RA (5  $\mu$ M) for 24 hours. (E) SPR analysis of the OA and TDP-43 binding. (F) Molecular docking model revealing RA binds to the RRM domain of TDP-43. Data are shown as mean  $\pm$  SEM of 3 independent experiments. \*\*\*  $P < 0.001$ , #  $P < 0.001$  for RA versus DMSO (B), ns, not significant, one-way ANOVA test (A), two-way ANOVA test (B, D).

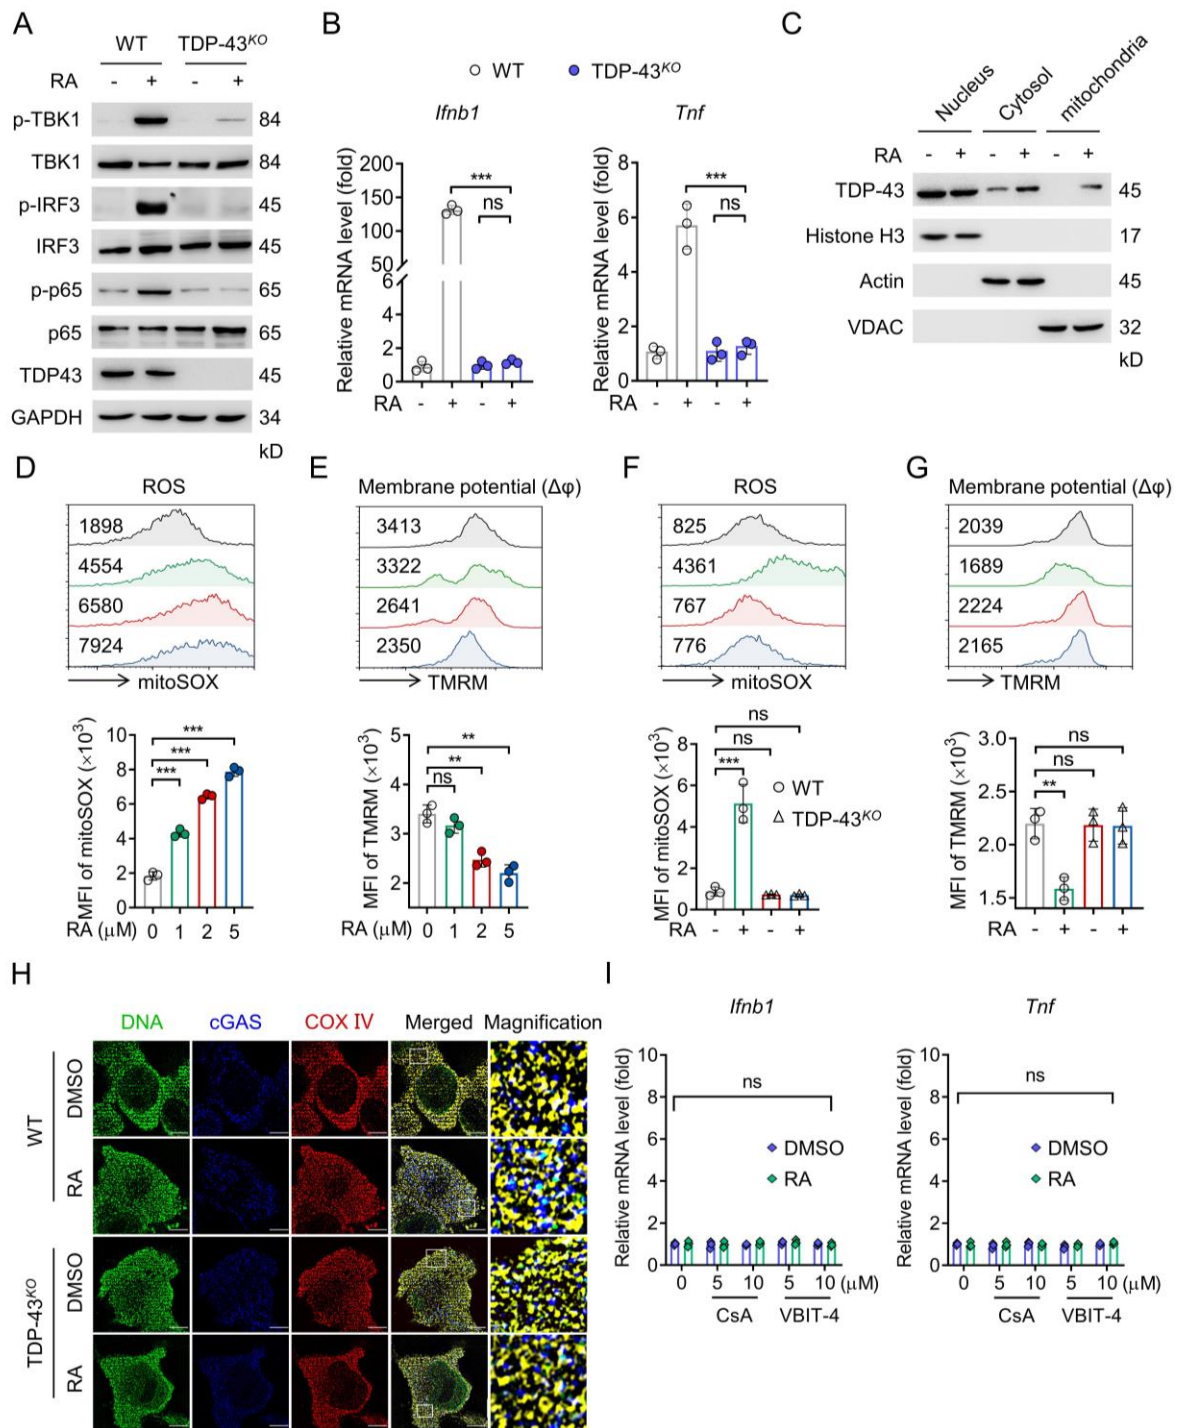

**Figure S7. RA induces mtDNA leakage and activates cGAS/STING signaling.** (A) Immunoblotting analysis of the phosphorylation levels of TBK1, IRF3 and p65 in WT or TDP-43<sup>KO</sup> B16 cells after RA (5  $\mu$ M) treatment for 24 hours. (B) qPCR analysis of the expressions of *Ifnb1* and *Tnf* in WT or TDP-43<sup>KO</sup> B16 cells after RA (5  $\mu$ M) treatment for 24 hours. (C) Immunoblotting determining the distribution of TDP-43 in nucleus, cytoplasm and mitochondria of B16 cells treated with RA (5  $\mu$ M) for 24 hours. H3, actin, and VDAC were used as the loading control for nucleus, cytoplasm and mitochondria, respectively. (D and E) FACS analysis of the changes of ROS level (D) and membrane potential ( $m\Delta\psi$ , E) in B16 cells treated with indicated dose of RA for 6 hours. (F and G) WT or TDP-43<sup>KO</sup> B16 cells were treated with indicated RA for 6 hours, the changes of ROS level (F) and membrane

potential (G) were then determined by FASC. (H) WT or TDP-43<sup>KO</sup> B16 cells were treated with RA (5  $\mu$ M) for 12 hours, and the co-localization of cGAS and mtDNA was investigated by confocal microscopy. Scale bar: 5  $\mu$ m. (I) TDP-43<sup>KO</sup> B16 cells were pretreated with mtDNA leakage inhibitors CsA and VBIT-4, followed by RA treatment for 24 hours, the expressions of *Ifnb1* and *Tnf* were analyzed by qPCR. Data are shown as mean  $\pm$  SEM of 3 independent experiments. \*\*  $P < 0.01$ , \*\*\*  $P < 0.001$ , ns, not significant, one-way ANOVA test (D, E), two-way ANOVA test (B, F, G, I).

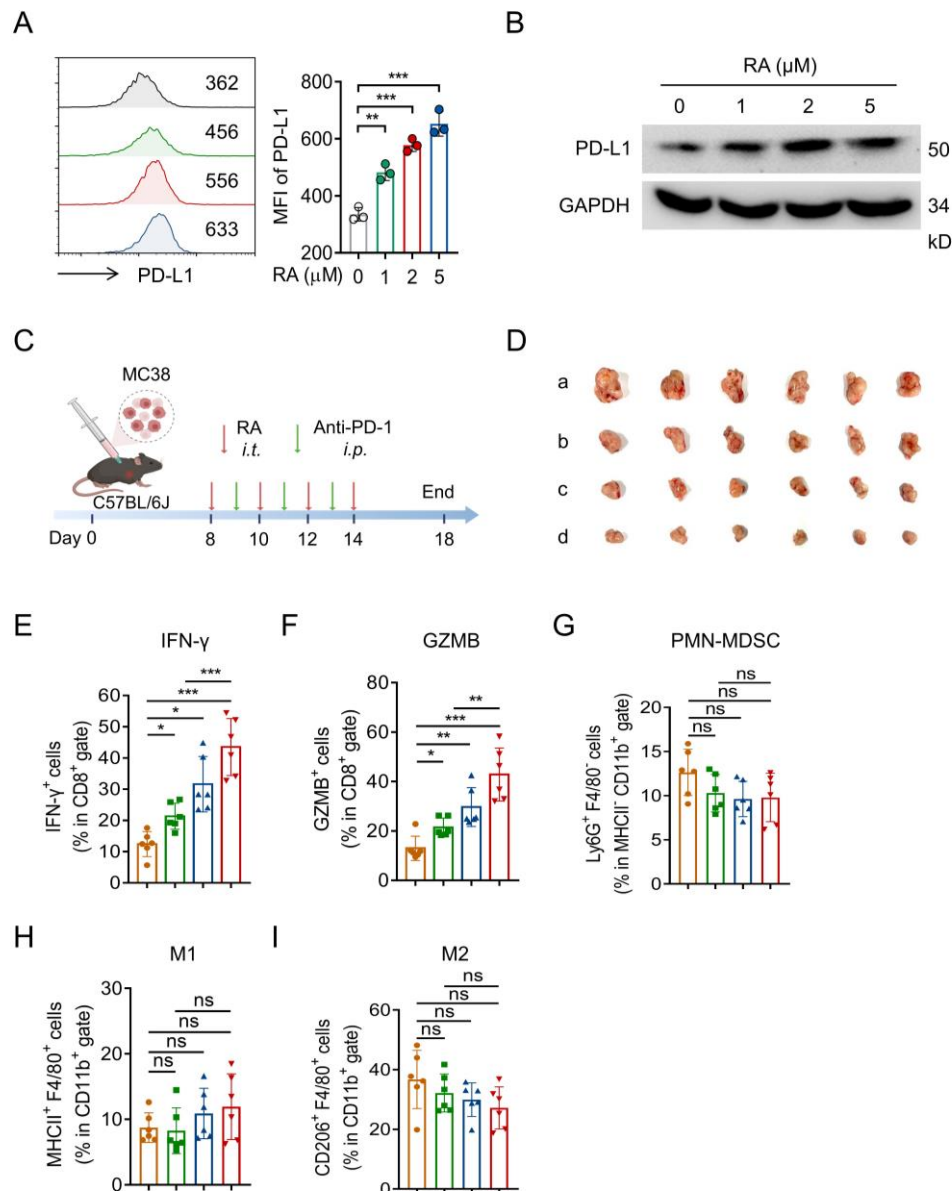

**Figure S8. Effects of RA on tumor growth and tumor microenvironment.** (A and B) FACS (A) and immunoblotting (B) analysis of surface PD-L1 levels in MC38 cells treated with indicated dose of RA for 24 hours. (C-D) C57BL/6 mice bearing MC38 tumor were treated with PBS, anti-PD1, RA or the combination. The arrows show the treatment protocol (C), and the MC38 tumors were *ex vivo* observed (D). (E-I) The levels of IFN- $\gamma$  (E) and Gzmb (F) secreted from CD8<sup>+</sup>T cells, and populations of PMS-MDSC cells (G), M1 macrophages (H), and M2 macrophages (I) were analyzed by FASC. Data are shown as mean  $\pm$  SEM of 3 independent experiments. \*  $P < 0.05$ , \*\*  $P < 0.01$ , \*\*\*  $P < 0.001$ , ns, not significant, one-way ANOVA test (A, E-I).

**A**

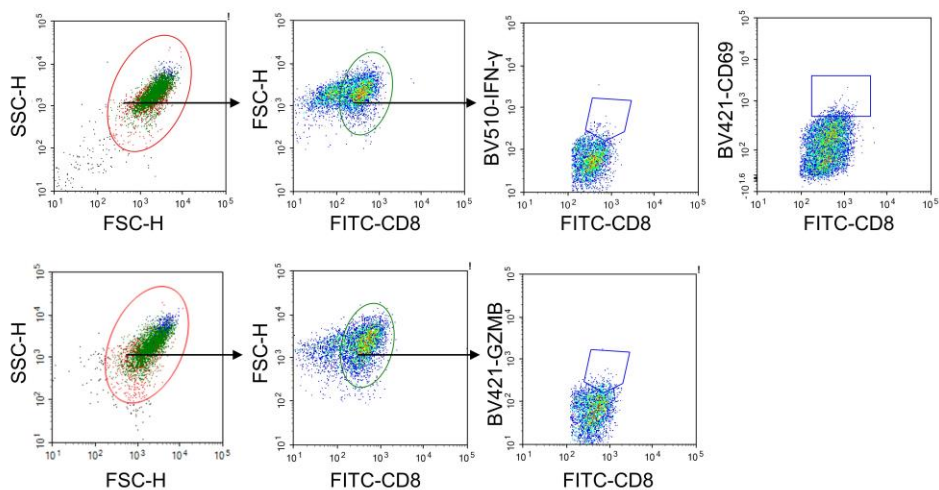

**B**

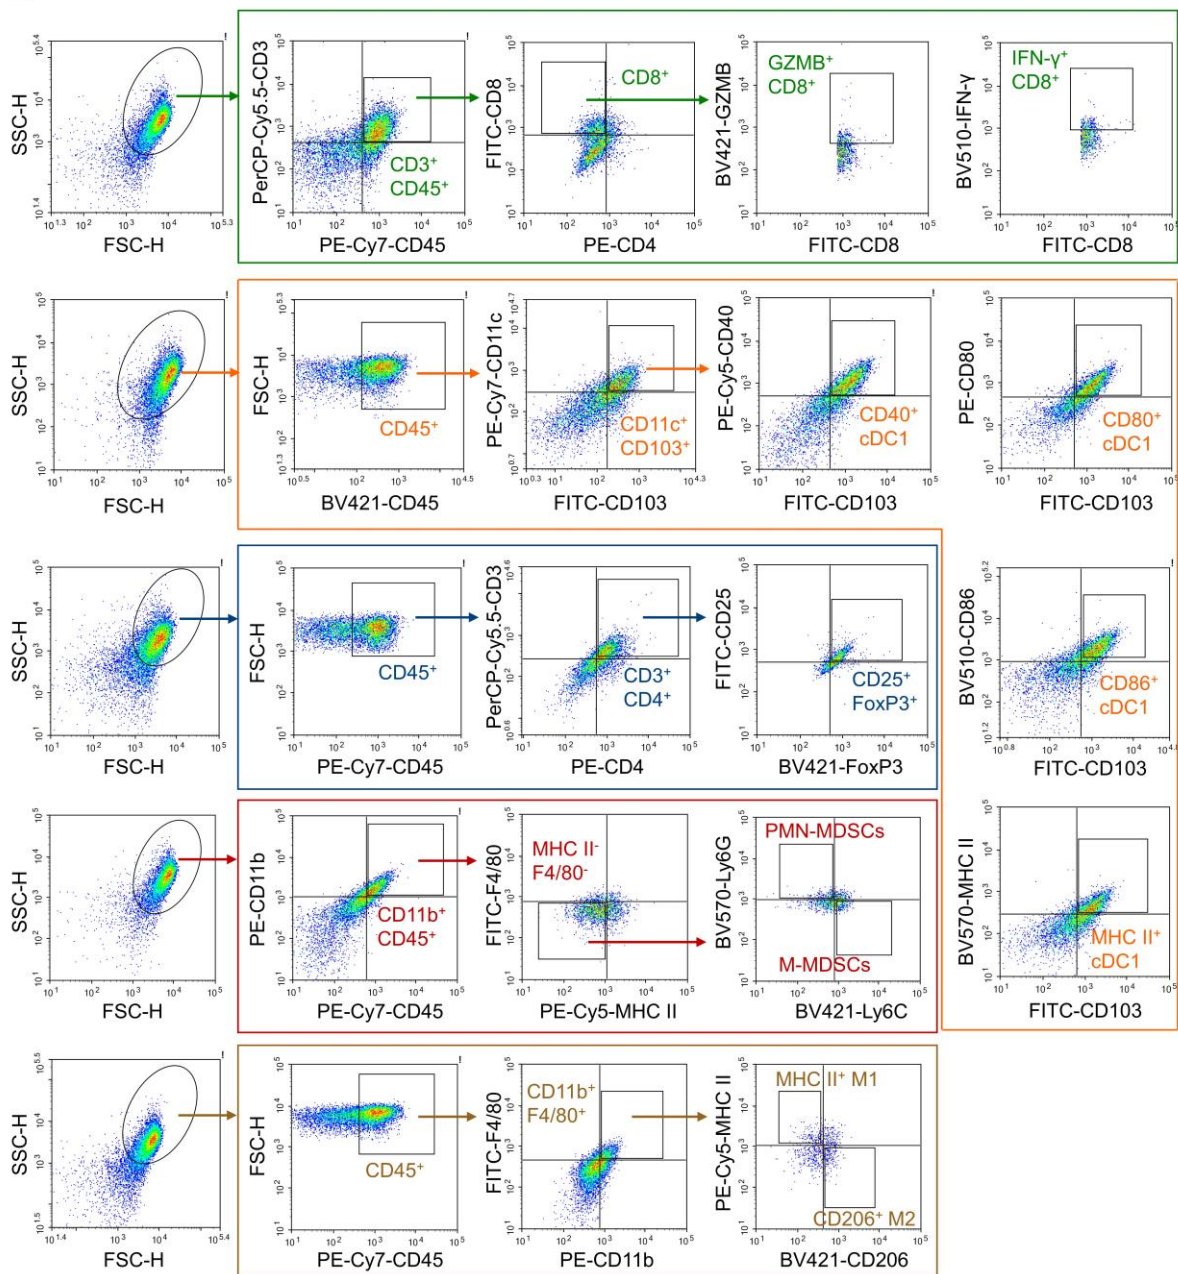

**Figure S9. Gating strategies for FASC.** (A) Gating strategy for CD8<sup>+</sup> T cell, CD69, IFN- $\gamma$  and GZMB in tumor cells-BMDCs-T cells co-culture assay. (B) Flow cytometry gating strategies for analysis of tumor-infiltrating CD8<sup>+</sup> T, DCs, Tregs, MDSCs, and macrophages were shown.

Table S1. Reagents and commercial assay kits used in this study

| <b>REAGENTS/COMMERCIAL KITS</b>                      | <b>SOURCE</b>             | <b>IDENTIFIER</b> |
|------------------------------------------------------|---------------------------|-------------------|
| Natural Product Library                              | Selleck                   | Cat# L1400        |
| Oleanolic Acid                                       | Selleck                   | Cat# S2334        |
| H-151                                                | Selleck                   | Cat# S6652        |
| RU.521                                               | Selleck                   | Cat# S6841        |
| Cyclosporin A                                        | Selleck                   | Cat# S2286        |
| VBIT-4                                               | Selleck                   | Cat# S3544        |
| MitoSOXTM Red                                        | Thermo Fisher Scientific  | Cat# M36008       |
| Tetramethylrhodamine methyl ester perchlorate (TMRM) | Thermo Fisher Scientific  | Cat# T5428        |
| Chlorophenolred $\beta$ -D-galactopyranoside (CPRG)  | Cayman Chemical           | Cat# 29707        |
| Cytochrome c                                         | Sigma-Aldrich             | Cat# C2506        |
| Blocking buffer                                      | Cell Signaling Technology | Cat# 12411        |
| Renilla-Glo™ Luciferase Assay Kit                    | Promega                   | Cat# E2710        |
| ENLITEN® ATP assay system                            | Promega                   | Cat# FF2000       |
| RNeasy Kit                                           | Qiagen                    | Cat# 75162        |
| SuperScript™ III CellsDirect™ cDNA Synthesis Kit     | Invitrogen                | Cat# 18080300     |
| TB Green® Premix Ex Taq™ (Tli RNaseH Plus)           | Takara                    | Cat# RR420A       |
| Minute™ Mitochondria Isolation Kit                   | Invent Biotechnologies    | Cat# MP-007       |
| Mouse IL-2 Quantikine ELISA Kit                      | R&D Systems               | Cat# SM2000       |
| Mouse IFN-gamma Quantikine ELISA Kit                 | R&D Systems               | Cat# MIF00        |

|                                                          |                           |               |
|----------------------------------------------------------|---------------------------|---------------|
| Mouse TNF-alpha Quantikine ELISA Kit                     | R&D Systems               | Cat# MTA00B   |
| Mouse IFN-beta Quantikine ELISA Kit                      | R&D Systems               | Cat# MIFNB0   |
| Mouse CXCL10/IP-10/CRG-2 ELISA Kit                       | R&D Systems               | Cat# DY466-05 |
| InVivoMAb anti-mouse PD-1 (CD279)                        | Bio X Cell                | Cat# BE0033-2 |
| InVivoMAb polyclonal Armenian hamster IgG                | Bio X Cell                | Cat# BE0091   |
| InVivoMAb anti-mouse CD8 $\alpha$                        | Bio X Cell                | Cat# BE0004-1 |
| InVivoMAb rat IgG2a isotype control, anti-trinitrophenol | Bio X Cell                | Cat# BE0089   |
| Streptavidin (Sepharose® Bead Conjugate)                 | Cell Signaling Technology | Cat# 3419     |
| SR7000 GOLD SENSOR SLIDE                                 | Reichert Inc.             | Cat# 13206066 |
| Recombinant Murine GM-CSF                                | Peptotech                 | Cat# 315-03   |
| Recombinant Murine IL-4                                  | Peptotech                 | Cat# 214-14   |

Table S2. Antibodies used for immunoblotting.

| <b>ANTIBODY</b>                   | <b>SOURCE</b>             | <b>IDENTIFIER</b> |
|-----------------------------------|---------------------------|-------------------|
| TDP43 Antibody                    | Cell Signaling Technology | Cat# 3448         |
| GAPDH Rabbit mAb                  | Cell Signaling Technology | Cat# 5174         |
| $\alpha$ -Tubulin Antibody        | Cell Signaling Technology | Cat# 2144         |
| $\beta$ -Actin Mouse mAb          | Cell Signaling Technology | Cat# 3700S        |
| VDAC Rabbit mAb                   | Cell Signaling Technology | Cat# 4661         |
| Histone H3 Rabbit mAb             | Cell Signaling Technology | Cat# 4499         |
| CGAS Rabbit mAb                   | Cell Signaling Technology | Cat# 31659        |
| STING Rabbit mAb                  | Cell Signaling Technology | Cat# 13647        |
| IRF-3 Rabbit mAb                  | Cell Signaling Technology | Cat# 4302         |
| Phospho-IRF-3 (Ser396) Rabbit mAb | Cell Signaling Technology | Cat# 4947         |
| NF- $\kappa$ B p65 Rabbit mAb     | Cell Signaling Technology | Cat# 8242         |

|                                                |                           |               |
|------------------------------------------------|---------------------------|---------------|
| Phospho-NF- $\kappa$ B p65 (Ser536) Rabbit mAb | Cell Signaling Technology | Cat# 3033     |
| TBK1/NAK Rabbit mAb                            | Cell Signaling Technology | Cat# 38066    |
| Phospho-TBK1/NAK (Ser172) Rabbit mAb           | Cell Signaling Technology | Cat# 5483     |
| Anti-TLR3 antibody                             | Abcam                     | Cat# ab13915  |
| Anti-PKR antibody                              | Abcam                     | Cat# ab184257 |
| Anti-MAVS antibody                             | Abcam                     | Cat# ab189109 |

Table S3. Antibodies used for FACS, IF and IHC analysis

| <b>ANTIBODY</b>                                                        | <b>SOURCE</b> | <b>IDENTIFIER</b> |
|------------------------------------------------------------------------|---------------|-------------------|
| PE/Cyanine7 anti-mouse CD11c antibody                                  | Biolegend     | Cat# 117317       |
| PE/Cyanine5 anti-mouse CD40 antibody                                   | Biolegend     | Cat# 124617       |
| Brilliant Violet 510™ anti-mouse CD86 antibody                         | Biolegend     | Cat# 105039       |
| PE anti-mouse CD80 antibody                                            | Biolegend     | Cat# 104707       |
| FITC anti-mouse H-2Kb antibody                                         | Biolegend     | Cat# 116505       |
| PE/Cyanine5 anti-mouse I-A/I-E antibody                                | Biolegend     | Cat# 107611       |
| PE anti-mouse H-2Kb S IINFEKL antibody                                 | Biolegend     | Cat# 141603       |
| PE/Cyanine7 anti-mouse CD45 antibody                                   | Biolegend     | Cat# 157205       |
| Brilliant Violet 421™ anti-mouse CD45 antibody                         | Biolegend     | Cat# 103133       |
| PerCP/Cyanine5.5 anti-mouse CD3 antibody                               | Biolegend     | Cat# 100217       |
| FITC anti-mouse CD8a antibody                                          | Biolegend     | Cat# 100705       |
| PE anti-mouse CD4 antibody                                             | Biolegend     | Cat# 100407       |
| Brilliant Violet 421™ anti-human/mouse Granzyme B Recombinant antibody | Biolegend     | Cat# 396414       |
| Brilliant Violet 510™ anti-mouse IFN- $\gamma$ antibody                | Biolegend     | Cat# 505841       |
| PE anti-mouse/human CD11b antibody                                     | Biolegend     | Cat# 101207       |
| FITC anti-mouse F4/80 antibody                                         | Biolegend     | Cat# 123107       |

|                                                       |                           |                |
|-------------------------------------------------------|---------------------------|----------------|
| Brilliant Violet 421™ anti-mouse CD206 (MMR) antibody | Biolegend                 | Cat# 141717    |
| FITC anti-mouse CD25 antibody                         | Biolegend                 | Cat# 101907    |
| Brilliant Violet 421™ anti-mouse FOXP3 antibody       | Biolegend                 | Cat# 126419    |
| Brilliant Violet 421™ anti-mouse Ly-6C antibody       | Biolegend                 | Cat# 128031    |
| Brilliant Violet 570™ anti-mouse Ly-6G antibody       | Biolegend                 | Cat# 127629    |
| Brilliant Violet 421™ anti-mouse CD69 antibody        | Biolegend                 | Cat# 104527    |
| Brilliant Violet 421™ anti-mouse CD206 (MMR) antibody | Biolegend                 | Cat# 141717    |
| Calreticulin Rabbit mAb (AF 488 Conjugate)            | Cell Signaling Technology | Cat# 62304S    |
| Rabbit mAb IgG Isotype control (AF 488 Conjugate)     | Cell Signaling Technology | Cat# 2975S     |
| FITC anti-mouse CD103 antibody                        | Biolegend                 | Cat# 121419    |
| CD8 $\alpha$ Rabbit mAb (Mouse Specific)              | Cell Signaling Technology | Cat# 60168     |
| Cleaved Caspase-3 (Asp175) Rabbit mAb                 | Cell Signaling Technology | Cat# 9664      |
| Anti-CD103 antibody                                   | Abcam                     | Cat# ab224202  |
| Anti-DNA mAb                                          | Progen                    | Cat# 61014     |
| cGAS Rabbit mAb                                       | Biorbyt                   | Cat# rb1149894 |
| Anti-COX IV-AF647 antibody                            | ImmunoWay                 | Cat# YM2009    |
| Goat anti-Mouse IgG, IgM (H+L) (AF 488)               | Invitrogen                | Cat# A-10680   |
| Goat Anti-Rabbit IgG H&L (Alexa Fluor® 405)           | Abcam                     | Cat# ab175652  |

Table S4. Primers for RT-qPCR

|                           |                        |
|---------------------------|------------------------|
| qPCR: Mouse IFNB1 forward | ATGGAGATGACGGAGAAGATGC |
| qPCR: Mouse IFNB1 reverse | TTCAGAAACACTGTCTGCTGGT |
| qPCR: Mouse TNF forward   | CCTCTCATCAGTTCTATGGCCC |
| qPCR: Mouse TNF reverse   | GTCTTTGAGATCCATGCCGTTG |



|                            |                        |
|----------------------------|------------------------|
| qPCR: Mouse ISG15 forward  | GTCTTACCCTTTCCAGTCTGGG |
| qPCR: Mouse ISG15 reverse  | TACAGTCTGCGTCAGAAAGACC |
| qPCR: Mouse CXCL10 forward | TCATTTTCTGCCTCATCCTGCT |
| qPCR: Mouse CXCL10 reverse | TCTGCAAGCTGAAGGGATTCT  |
| qPCR: Mouse IFIT1 forward  | ATGTCAGAAGGAAGAGTGCAGG |
| qPCR: Mouse IFIT1 reverse  | TGCATGCTACCTGAGTTGACAT |
| qPCR: Mouse CCL5 forward   | TTTCTTCCTTCTCCCAGATGGC |
| qPCR: Mouse CCL5 reverse   | TATACCCACAGAGGAACCCAT  |
| qPCR: Mouse IRF9 forward   | GGAAAAGCACAAAGATGGGGAC |
| qPCR: Mouse IRF9 reverse   | GCTTGCATGGTGATTTCTGGTT |
| qPCR: Mouse GAPDH forward  | TGGCCTCCAAGGAGTAAGAAAC |
| qPCR: Mouse GAPDH reverse  | ATTCAAGAGAGTAGGGAGGGCT |

Table S5. sgRNA sequence for knocking out the indicated proteins.

|                             |                      |
|-----------------------------|----------------------|
| sgRNA: Mouse cGAS forward   | CGAGGCGCGGAAAGTCGTAA |
| sgRNA: Mouse cGAS reverse   | TTACGACTTTCCGCGCCTCG |
| sgRNA: Mouse STING forward  | GTACCCAATGTAGTATGACC |
| sgRNA: Mouse STING reverse  | GGTCATACTACATTGGGTAC |
| sgRNA: Mouse MAVS forward   | GCCACCAGACATCCTCGCGA |
| sgRNA: Mouse MAVS reverse   | TCGCGAGGATGTCTGGTGGC |
| sgRNA: Mouse TLR3 forward   | GTACTGCTCATTACATCGA  |
| sgRNA: Mouse TLR3 reverse   | TCGATGTGAATGAGCAGTAC |
| sgRNA: Mouse PKR forward    | CGTTCGTCTAAAAGGCAGAG |
| sgRNA: Mouse PKR reverse    | CTCTGCCTTTTAGACGAACG |
| sgRNA: Mouse TDP-43 forward | ACTGGTCACTCGAAAGGGTT |

|                             |                      |
|-----------------------------|----------------------|
| sgRNA: Mouse TDP-43 reverse | AACCCTTTCGAGTGACCAGT |
|-----------------------------|----------------------|

Table S6. siRNA sequence for knocking down the indicated proteins.

|                             |                       |
|-----------------------------|-----------------------|
| siRNA: Mouse Tln2 forward   | CTGTGAAGGCAGTGGAAGATT |
| siRNA: Mouse Tln2 reverse   | TCTTCCACTGCCTTCACAGTT |
| siRNA: Mouse Myo18a forward | CTGTGAAGGCAGTGGAAGATT |
| siRNA: Mouse Myo18a reverse | TCTTCCACTGCCTTCACAGTT |
| siRNA: Mouse Myh10 forward  | CTGTGAAGGCAGTGGAAGATT |
| siRNA: Mouse Myh10 reverse  | TCTTCCACTGCCTTCACAGTT |
| siRNA: Mouse Tdp43 forward  | CTGTGAAGGCAGTGGAAGATT |
| siRNA: Mouse Tdp43 reverse  | TCTTCCACTGCCTTCACAGTT |
| siRNA: Mouse Tmem43 forward | CTGTGAAGGCAGTGGAAGATT |
| siRNA: Mouse Tmem43 reverse | TCTTCCACTGCCTTCACAGTT |
| siRNA: Mouse Mtif2 forward  | CTGTGAAGGCAGTGGAAGATT |
| siRNA: Mouse Mtif2 reverse  | TCTTCCACTGCCTTCACAGTT |
| siRNA: Mouse Ssr1 forward   | CTGTGAAGGCAGTGGAAGATT |
| siRNA: Mouse Ssr1 reverse   | TCTTCCACTGCCTTCACAGTT |
| siRNA: Mouse Ndufa7 forward | CTGTGAAGGCAGTGGAAGATT |
| siRNA: Mouse Ndufa7 reverse | TCTTCCACTGCCTTCACAGTT |
| siRNA: Mouse Dad1 forward   | CTGTGAAGGCAGTGGAAGATT |
| siRNA: Mouse Dad1 reverse   | TCTTCCACTGCCTTCACAGTT |
| siRNA: Mouse Mif forward    | CTGTGAAGGCAGTGGAAGATT |
| siRNA: Mouse Mif reverse    | TCTTCCACTGCCTTCACAGTT |
